# Supplementary material
Source: PubMed Central journal article supplement (PMC10430768)
Supplement: NIHMS1903421-supplement-Supplemental_Publication_Material.pdf [file NIHMS1903421-supplement-Supplemental_Publication_Material.pdf]

## SUPPLEMENTAL MATERIAL

### **Left Ventricular Gene Expression in Heart Failure with Preserved Ejection Fraction**

#### Pro-fibrotic and Pro-inflammatory Pathway and Genes

Bo Ye et al.

#### TABLE OF CONTENT

|                                                                           |   |
|---------------------------------------------------------------------------|---|
| Figure S1. RNA sequencing quality.                                        | 2 |
| Table S1. Transcriptome-based differentially regulated pathways in HFpEF. | 3 |
| Table S2. Low abundance fibrillar and nonfibrillar collagens.             | 4 |
| Table S3. MMPs and TIMPs.                                                 | 5 |
| Table S4. Cytoskeletal and myofilament genes.                             | 6 |

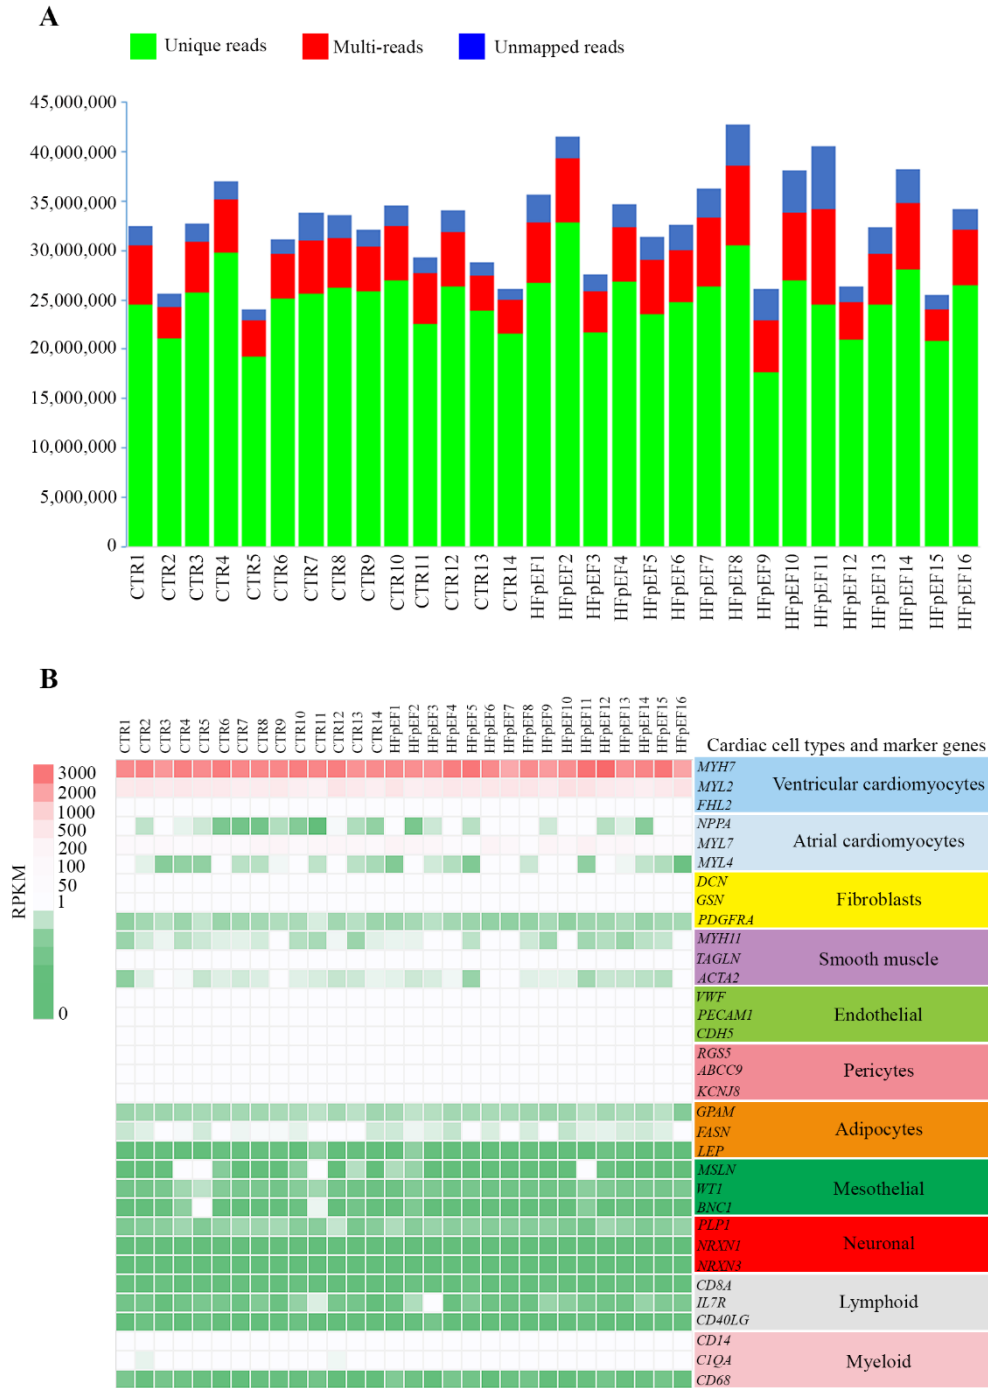

**Figure S1. RNA sequencing quality.** **A**, Mapping statistics of all samples for RNA sequencing. A stacked bar plot shows uniquely mapped, multiple mapped and unmapped reads against the human reference genome for each sample. **B**, Heat map detailing a representative selection of biomarker expression for the 11 major cell types among the heart biopsy samples from control (CTR) and HFpEF patients. Transcript abundances of different biomarkers were evaluated and compared in individual heart biopsy samples using reads per kilobase of transcript per million mapped reads (RPKM).

**Table S1. Transcriptome-based differentially regulated pathways in HFpEF.**

| Name of pathway                                                                        | Direction | Number of genes | Average fold change | FDR p value |
|----------------------------------------------------------------------------------------|-----------|-----------------|---------------------|-------------|
| Axon guidance                                                                          | Down      | 502             | -0.0524             | 0.0010      |
| Nervous system development                                                             | Down      | 524             | -0.0570             | 0.0010      |
| Developmental Biology                                                                  | Down      | 803             | -0.0461             | 0.0020      |
| Ligand-receptor interactions                                                           | Down      | 6               | -0.3698             | 0.0030      |
| Assembly Of The HIV Virion                                                             | Down      | 13              | -0.0696             | 0.0030      |
| APEX1-Independent Resolution of AP Sites via the Single Nucleotide Replacement Pathway | Down      | 7               | -0.0142             | 0.0040      |
| RAF activation                                                                         | Up        | 33              | 0.0292              | 0.0040      |
| Membrane binding and targeting of GAG proteins                                         | Down      | 11              | -0.0659             | 0.0050      |
| Synthesis And Processing Of GAG, GAGPOL Polyproteins                                   | Down      | 11              | -0.0659             | 0.0050      |
| DNA Damage Reversal                                                                    | Up        | 8               | 0.0213              | 0.0060      |
| Plasma lipoprotein clearance                                                           | Down      | 33              | -0.0850             | 0.0070      |
| Infectious disease                                                                     | Up        | 852             | 0.0051              | 0.0070      |
| Reversal of alkylation damage by DNA dioxygenases                                      | Up        | 7               | 0.0433              | 0.0090      |
| Formation of annular gap junctions                                                     | Down      | 11              | -0.0284             | 0.0090      |
| Gap junction degradation                                                               | Down      | 12              | -0.0300             | 0.0090      |
| LDL clearance                                                                          | Down      | 18              | -0.0770             | 0.0090      |
| VLDLR internalisation and degradation                                                  | Up        | 13              | 0.0033              | 0.0100      |
| RHOF GTPase cycle                                                                      | Down      | 40              | -0.0463             | 0.0100      |
| VLDL clearance                                                                         | Down      | 5               | -0.3511             | 0.0140      |
| CS/DS degradation                                                                      | Down      | 13              | -0.1541             | 0.0140      |
| WNT5A-dependent internalization of FZD4                                                | Up        | 14              | 0.0160              | 0.0150      |
| Trafficking of AMPA receptors                                                          | Up        | 24              | 0.1625              | 0.0150      |
| Glutamate binding, activation of AMPA receptors and synaptic plasticity                | Up        | 24              | 0.1625              | 0.0150      |
| N-glycan trimming and elongation in the cis-Golgi                                      | Down      | 5               | -0.1300             | 0.0160      |
| Regulation of glycolysis by fructose 2,6-bisphosphate metabolism                       | Up        | 10              | 0.0194              | 0.0160      |
| Retrograde neurotrophin signalling                                                     | Up        | 14              | 0.0744              | 0.0160      |
| EPH-ephrin mediated repulsion of cells                                                 | Down      | 49              | -0.1069             | 0.0160      |
| Activation of the AP-1 family of transcription factors                                 | Down      | 9               | -0.2310             | 0.0180      |
| SARS-CoV Infections                                                                    | Up        | 326             | 0.0121              | 0.0190      |
| WNT5A-dependent internalization of FZD2, FZD5 and ROR2                                 | Up        | 13              | 0.0622              | 0.0230      |

**Table S1.** List of the 30 most differentially regulated pathways with at least 5 genes from the ReactomeGSA analysis based on the RNA sequencing transcriptome data. The results are ranked by p values.

**Table S2. Low abundance fibrillar and nonfibrillar collagens.**

| Gene ID        | Family                 | Subfamily                         | Mean CTR (CPM) | Mean HFpEF (CPM) | FDR p value |
|----------------|------------------------|-----------------------------------|----------------|------------------|-------------|
| <i>COL2A1</i>  | Fibrillar collagens    |                                   | 0.1698         | 0.1145           | 0.0895      |
| <i>COL11A1</i> | Fibrillar collagens    |                                   | 0.2399         | 0.2540           | 0.9786      |
| <i>COL8A2</i>  | Nonfibrillar collagens | Network-forming collagens         | 0.7718         | 0.5661           | 0.6745      |
| <i>COL10A1</i> | Nonfibrillar collagens | Network-forming collagens         | 0.1272         | 0.0941           | 0.9153      |
| <i>COL9A1</i>  | Nonfibrillar collagens | FACITs                            | 0.5764         | 0.6081           | 0.9223      |
| <i>COL9A2</i>  | Nonfibrillar collagens | FACITs                            | 0.7903         | 0.6673           | 0.8231      |
| <i>COL20A1</i> | Nonfibrillar collagens | FACITs                            | 0.0403         | 0.0736           | 0.7417      |
| <i>COL6A5</i>  | Nonfibrillar collagens | Beaded filament forming collagens | 0.0000         | 0.0129           | 0.5671      |
| <i>COL26A1</i> | Nonfibrillar collagens | Beaded filament forming collagens | 0.0878         | 0.0511           | 0.7810      |

**Table S2.** List of genes encoding low abundance fibrillar and nonfibrillar collagens in control and HFpEF myocardium. The mean counts per million (CPM) values have been provided for each group, which are indicative of their respective expression levels in control and HFpEF samples. FACITs, fibril-associated collagens with interrupted triple helices.

**Table S3. MMPs and TIMPs.**

| Gene ID       | Mean CTR (CPM) | Mean HFpEF (CPM) | FDR p value |
|---------------|----------------|------------------|-------------|
| <i>MMP1</i>   | 0.0000         | 0.0544           | 0.5313      |
| <i>MMP2</i>   | 88.7697        | 68.8905          | 0.3126      |
| <i>MMP7</i>   | 0.0000         | 0.0092           | 0.5978      |
| <i>MMP8</i>   | 0.0000         | 0.0036           | 0.6745      |
| <i>MMP9</i>   | 0.3624         | 0.6330           | 0.5978      |
| <i>MMP10</i>  | 0.0000         | 0.0144           | 0.5307      |
| <i>MMP11</i>  | 4.5391         | 3.9548           | 0.7133      |
| <i>MMP12</i>  | 0.0000         | 0.0036           | 0.6745      |
| <i>MMP14</i>  | 14.1081        | 12.8899          | 0.8524      |
| <i>MMP15</i>  | 46.5615        | 47.3848          | 0.8658      |
| <i>MMP16</i>  | 5.6645         | 3.8409           | 0.3219      |
| <i>MMP17</i>  | 0.9284         | 0.7991           | 0.8943      |
| <i>MMP19</i>  | 1.6789         | 1.5386           | 0.9449      |
| <i>MMP21</i>  | 0.3727         | 0.1957           | 0.5671      |
| <i>MMP23A</i> | 0.0601         | 0.0294           | 0.7995      |
| <i>MMP23B</i> | 0.2725         | 0.3976           | 0.6745      |
| <i>MMP24</i>  | 1.6046         | 0.7482           | 0.5203      |
| <i>MMP25</i>  | 0.7280         | 1.2631           | 0.5502      |
| <i>MMP26</i>  | 0.0000         | 0.0038           | 0.6745      |
| <i>MMP27</i>  | 0.0137         | 0.0000           | 0.5307      |
| <i>MMP28</i>  | 2.8463         | 1.4802           | 0.0321      |
| <i>TIMP1</i>  | 24.7221        | 16.3035          | 0.6745      |
| <i>TIMP2</i>  | 84.3129        | 78.0020          | 0.7498      |
| <i>TIMP3</i>  | 351.5246       | 268.6983         | 0.1814      |
| <i>TIMP4</i>  | 4.9353         | 4.2513           | 0.7545      |

**Table S3.** List of matrix metalloproteinases (MMPs) and tissue inhibitor of metalloproteinase (TIMPs) in control and HFpEF myocardium. The mean counts per million (CPM) values are provided for control and HFpEF groups.

**Table S4. Cytoskeletal and myofilament genes.**

| Gene ID       | Family                             | Mean CTR (CPM) | Mean HFpEF (CPM) | FDR p value |
|---------------|------------------------------------|----------------|------------------|-------------|
| <i>DES</i>    | Intermediate filament cytoskeleton | 7837.8138      | 8501.3930        | 0.6464      |
| <i>SYNM</i>   | Intermediate filament cytoskeleton | 777.6479       | 837.1178         | 0.6144      |
| <i>VIM</i>    | Intermediate filament cytoskeleton | 186.5659       | 157.4826         | 0.5671      |
| <i>NES</i>    | Intermediate filament cytoskeleton | 309.9587       | 378.6129         | 0.5307      |
| <i>LMNA</i>   | Intermediate filament cytoskeleton | 128.5870       | 125.3578         | 0.9891      |
| <i>TUBB</i>   | Microtubule cytoskeleton           | 102.3362       | 96.2702          | 0.9352      |
| <i>TUBB4B</i> | Microtubule cytoskeleton           | 114.0790       | 110.7394         | 0.9828      |
| <i>TUBB6</i>  | Microtubule cytoskeleton           | 36.5953        | 38.1524          | 0.7894      |
| <i>TUBA4A</i> | Microtubule cytoskeleton           | 31.6231        | 38.4181          | 0.4992      |
| <i>TUBA1A</i> | Microtubule cytoskeleton           | 34.3919        | 36.2131          | 0.7318      |
| <i>ACTC1</i>  | Sarcomeric actomyosin              | 3811.9300      | 3912.5995        | 0.7939      |
| <i>MYH6</i>   | Sarcomeric actomyosin              | 1650.4635      | 1525.9284        | 0.9411      |
| <i>MYH7</i>   | Sarcomeric actomyosin              | 60323.4541     | 59080.3449       | 0.9865      |
| <i>ACTG1</i>  | Non-sarcomeric actomyosin          | 161.7771       | 129.4963         | 0.4983      |
| <i>ACTB</i>   | Non-sarcomeric actomyosin          | 414.2081       | 377.1633         | 0.8468      |
| <i>MYH3</i>   | Non-sarcomeric actomyosin          | 2.4056         | 2.5086           | 0.9145      |
| <i>MYH9</i>   | Non-sarcomeric actomyosin          | 613.0391       | 604.4274         | 0.9490      |
| <i>MYH11</i>  | Non-sarcomeric actomyosin          | 92.2866        | 102.3031         | 0.6746      |
| <i>MYH13</i>  | Non-sarcomeric actomyosin          | 0.0314         | 0.0930           | 0.5825      |

**Table S4.** List of cytoskeletal and myofibrillar mRNAs determined by RNA sequencing in control (CTR) and HFpEF myocardium. CPM, counts per million.
